# Supplementary material for: Is Support in the Anxiety of the Beholder? How Anxiety Interacts with Perceptions of Instructor Support in Introductory Biology Classes
Source: Atypon-hosted journal article supplement (doi:10.1187/cbe.24-02-0092), 2024-09-25
Supplement: combinedsupmats.pdf [file combinedsupmats.pdf]

# Supplemental Material

*CBE—Life Sciences Education*

Weatherton *et al.*

**Supplemental Materials**

**Is support in the anxiety of the beholder?**

**How anxiety interacts with perceptions of instructor support in introductory biology classes**

Research article

Maryrose Weatherton, Department of Theory and Practice in Teacher Education, The University of Tennessee Knoxville, Knoxville, TN 37996, United States

Elisabeth E. Schussler, Department of Ecology and Evolutionary Biology, The University of Tennessee Knoxville, Knoxville, TN 37996, United States

Jennifer R. Brigati, Department of Biology, Maryville College, Maryville, TN, 37804, United States

Hope Ferguson, Department of Ecology and Evolutionary Biology, The University of Tennessee Knoxville, Knoxville, TN 37996, United States

Isabel Boyd, Department of Mechanical, Aerospace, and Biomedical Engineering, The University of Tennessee Knoxville, Knoxville, TN 37996, United States

Benjamin J. England, Department of Biology, Saint Louis University, St. Louis, MO, 63103, United States

Corresponding Author: Maryrose Weatherton, Department of Theory and Practice in Teacher Education, The University of Tennessee Knoxville, Knoxville TN 37996, United States

429 Claxton Hall  
915 Volunteer Boulevard  
Knoxville, TN 37996-1610  
United States  
Email: [mweath13@vols.utk.edu](mailto:mweath13@vols.utk.edu)

Table S1: Codebook with descriptions and quotes exemplifying each code for the three main themes of the study: relational, instrumental, and pedagogical.

| Code Name / Description                                                                                                                                                                              |                                                                                                                                     | Positive and negative examples of code |
|------------------------------------------------------------------------------------------------------------------------------------------------------------------------------------------------------|-------------------------------------------------------------------------------------------------------------------------------------|----------------------------------------|
| Relational (A theme) - support or non-support in a relational way with instructor - how they interact with individual students or the class to convey support or not, instructor's perceived nature. |                                                                                                                                     |                                        |
| A1 - how they feel about interacting (personally) with the instructor                                                                                                                                | A1+ "it is easy to talk with them"<br>A1- "made me feel dumb when I asked them a question"                                          |                                        |
| A2 – Perceived that the instructor cares about their success / their learning (or doesn't)                                                                                                           | A2+ "they make it apparent that they want us to learn"<br>A2- "they do not seem to care about our grades"                           |                                        |
| A3 - class climate - how instructor feels about the class/makes the class feel                                                                                                                       | A3+ "creates a very relaxed environment where I feel welcome"<br>A3- "discouraged us, said they were disappointed in test averages" |                                        |
| A4 - Perception about instructor's nature as a person or professor (who they are, how they act)- understanding, caring [person], approachable, attentive, friendly, blunt, sarcastic, Dismissive     | A4+ "very kind and understanding"<br>A4- "gets frustrated with the class very easily"                                               |                                        |
| Instrumental (B theme) - Student mentions something instructors DID or PROVIDED that supported them.                                                                                                 |                                                                                                                                     |                                        |
| B1 - Office hours (has them, offers them, encourages student attendance)                                                                                                                             | B1+ "plenty of office hours"<br>B1- "explained that they have office hours but will not take new students after November"           |                                        |
| B2 - Encourages and answers questions (INSIDE OR OUTSIDE of class)                                                                                                                                   | B2+ "open to answering questions"<br>B2- "it feels like if I ask [too many questions] it is a burden"                               |                                        |
| B3 - Responds to emails or doesn't respond (+/-) this is about email response generally                                                                                                              | B3+ "fast responses to emails"<br>B3- "I was sick and emailed my teacher about missing assignments and they did not answer"         |                                        |
| B4 - Offers materials / resources to help students succeed - study guide, review session (not SI), discussion board, practice questions, extra classes, posting                                      | B4+ "sends us emails about what to study"<br>B4- "doesn't really give us info about why answers are correct"                        |                                        |
| B5 - Flexible due dates or working with students when they have missed a class                                                                                                                       | B5+ "they took my first worksheet late with no penalty"<br>B5- n/a (nothing negative found)                                         |                                        |
| B6 - Gave them feedback on assignments                                                                                                                                                               | B6+ "went over a quiz after class which helped realize the correct answers"<br>B6- "feedback is almost nonexistent"                 |                                        |
| B7 - Encourages attendance at SI sessions                                                                                                                                                            | B7+ "encouraged SI"<br>B7- n/a (nothing negative found)                                                                             |                                        |

|                                                                                                                              |                                                                                                                                                                 |                                                                                                                                                                     |
|------------------------------------------------------------------------------------------------------------------------------|-----------------------------------------------------------------------------------------------------------------------------------------------------------------|---------------------------------------------------------------------------------------------------------------------------------------------------------------------|
|                                                                                                                              | B8 - Gave them extra chances / opportunities to improve their grade - bonus points, extra assignments, extra credit, to boost grade, re-dos on quizzes or other | B8+ “has allowed re-takes when things go wrong / the class does not understand things”<br>B8- “hasn’t given us any extra credit or bonus things to help our grades” |
|                                                                                                                              | B9 - Professor gives (or doesn’t give) students updates on due dates and how they are doing in the class; E-mails them with updates and reminders; reminders    | B9+ “always keeping us up to date when something changes”<br>B9- n/a (nothing negative found)                                                                       |
|                                                                                                                              | B10 - General catch-all for vague sentiments of helpfulness (generic statement without saying what they did to help or type of help)                            | B10+ “they offer lots of help”<br>B10- “has not tried to adjust to students needs after they reached out”                                                           |
| Pedagogical (C theme)- Students mention something that happened <u>IN CLASS</u> that made them feel supported / unsupported. |                                                                                                                                                                 |                                                                                                                                                                     |
|                                                                                                                              | C1 - Professor clearly explains things, good examples, makes sure they understand                                                                               | C1+ “uses good examples”<br>C1- “does not teach well at all”                                                                                                        |
|                                                                                                                              | C2 - Professor recognizes when they are struggling (good at reading the room)                                                                                   | C2+ “my instructor has recognized areas where the class struggles”<br>C2- “there are a lot of people struggling in the class and they don’t seem to care very much” |
|                                                                                                                              | C3 - Pace of lecture (how class is)– adjusted for student learning, or too fast/slow,                                                                           | C3+ “spends a lot of time on slides to allow notes to be taken”<br>C3- “goes over things kind of fast”                                                              |
|                                                                                                                              | C4 - Organization of professor or class (CUE word: ‘organized’/’organization’)                                                                                  | C4+ “the overall course is quite easy to follow because of the structure of lecture and canvas”<br>C4- “seems to be disorganized sometimes”                         |
|                                                                                                                              | C5 - Anything to do with the nature of exams EX: difficulty of the exams, format of the exams                                                                   | C5+ “the exam was good”<br>C5- “formatting for testing in the class is extremely difficult”                                                                         |
|                                                                                                                              | C6 - Other things about class or specifics about how the professor teaches. E.g. worksheets, active learning                                                    | C6+ “no pressure on clicker questions”<br>“interactive during class”<br>C6- “most people in the class don’t like their teaching style                               |

Table S2: Mean anxiety +/- standard deviation (Likert scale 1-7) for each class and overall at weeks four and 14

| Class 1 (N =94 ) |            | Class 2 (N =110 ) |             | Class 3 (N = 76) |             | Average     |             |
|------------------|------------|-------------------|-------------|------------------|-------------|-------------|-------------|
| Week four        | Week 14    | Week four         | Week 14     | Week four        | Week 14     | Week four   | Week 14     |
| 3.30 ± 1.50      | 3.7 ± 1.68 | 2.75 ± 1.28       | 2.46 ± 1.16 | 4.99 ± 1.38      | 5.40 ± 1.44 | 3.54 ± 1.66 | 3.68 ± 1.85 |

Table S3: Mean support +/- standard deviation (scaled 1-10) for each instructor and overall at weeks four and 14

| Class 1 (N = 94 ) |             | Class 2 (N = 110) |             | Class 3 (N = 76) |             | Average     |             |
|-------------------|-------------|-------------------|-------------|------------------|-------------|-------------|-------------|
| Week four         | Week 14     | Week four         | Week 14     | Week four        | Week 14     | Week four   | Week 14     |
| 6.69 ± 2.08       | 5.63 ± 2.45 | 9.09 ± 1.19       | 9.04 ± 1.26 | 6.41 ± 1.84      | 5.16 ± 2.37 | 7.56 ± 2.11 | 6.83 ± 2.71 |

Table S4: Comparison of relative prevalence of student comments about instructor support perceptions in each class at week 4 by higher- and lower-anxiety students (based on above and below class median anxiety levels at week 4). Relative prevalence is the number of codes mentioned by students in the lower- or higher-anxiety group, divided by the total number of those students in a class (numbers shown at the top of each column).

|                             | Class 1                                           |                                                    | Class 2                                           |                                                    | Class 3                                           |                                                    |
|-----------------------------|---------------------------------------------------|----------------------------------------------------|---------------------------------------------------|----------------------------------------------------|---------------------------------------------------|----------------------------------------------------|
|                             | WEEK 4 –<br>LOW-<br>ANXIETY<br>STUDENTS<br>(N=48) | WEEK 4 –<br>HIGH-<br>ANXIETY<br>STUDENTS<br>(N=46) | WEEK 4 –<br>LOW-<br>ANXIETY<br>STUDENTS<br>(N=55) | WEEK 4 –<br>HIGH-<br>ANXIETY<br>STUDENTS<br>(N=55) | WEEK 4 –<br>LOW-<br>ANXIETY<br>STUDENTS<br>(N=39) | WEEK 4 –<br>HIGH-<br>ANXIETY<br>STUDENTS<br>(N=37) |
| +Interactions with students | 2.1                                               | 2.2                                                | 3.6                                               | 1.8                                                | 5.1                                               | 0.0                                                |
| +Cares for student success  | 4.2                                               | 0.0                                                | 9.1                                               | 5.5                                                | 12.8                                              | 8.1                                                |
| +Class climate              | 8.3                                               | 2.2                                                | 7.3                                               | 5.5                                                | 5.1                                               | 5.4                                                |
| +Instructor personality     | 25.0                                              | 15.2                                               | 50.9                                              | 50.9                                               | 15.4                                              | 13.5                                               |
| +Office hours               | 18.8                                              | 15.2                                               | 18.2                                              | 14.5                                               | 7.7                                               | 2.7                                                |
| +Answering questions        | 18.8                                              | 13.0                                               | 21.8                                              | 27.3                                               | 7.7                                               | 2.7                                                |
| +Responding to emails       | 2.1                                               | 2.2                                                | 5.5                                               | 7.3                                                | 2.6                                               | 0.0                                                |
| +Offering materials         | 20.8                                              | 6.5                                                | 10.9                                              | 7.3                                                | 20.5                                              | 18.9                                               |
| +Flexible due dates         | 0.0                                               | 2.2                                                | 9.1                                               | 7.3                                                | 0.0                                               | 0.0                                                |
| +Feedback on assignments    | 0.0                                               | 4.4                                                | 5.5                                               | 3.6                                                | 2.6                                               | 0.0                                                |
| +Encouraging SI attendance  | 0.0                                               | 0.0                                                | 3.6                                               | 0.0                                                | 0.0                                               | 0.0                                                |
| +Bonus points               | 0.0                                               | 2.2                                                | 3.6                                               | 1.8                                                | 33.3                                              | 32.4                                               |
| +Due date reminders         | 6.3                                               | 2.2                                                | 7.3                                               | 5.5                                                | 5.1                                               | 0.0                                                |
| +Generic help               | 6.3                                               | 4.3                                                | 14.5                                              | 14.5                                               | 0.0                                               | 2.7                                                |
| +Clarity of explanations    | 18.8                                              | 13.0                                               | 18.2                                              | 9.1                                                | 15.4                                              | 5.4                                                |
| +Recognize student struggle | 0.0                                               | 0.0                                                | 0.0                                               | 0.0                                                | 2.6                                               | 5.4                                                |
| +Pace of lecture            | 0.0                                               | 0.0                                                | 5.5                                               | 5.5                                                | 2.6                                               | 0.0                                                |
| +Organization of class      | 2.1                                               | 0.0                                                | 0.0                                               | 0.0                                                | 0.0                                               | 0.0                                                |

|                             |      |     |      |     |     |      |
|-----------------------------|------|-----|------|-----|-----|------|
| +Nature of exams            | 2.1  | 0.0 | 0.0  | 1.8 | 0.0 | 0.0  |
| +Other practices            | 10.4 | 6.5 | 10.9 | 5.5 | 7.7 | 2.7  |
| -Interactions with students | 0.0  | 0.0 | 0.0  | 0.0 | 0.0 | 2.7  |
| -Cares for student success  | 2.1  | 0.0 | 0.0  | 0.0 | 7.7 | 10.8 |
| -Class climate              | 2.1  | 4.3 | 0.0  | 0.0 | 5.1 | 10.8 |
| -Instructor personality     | 2.1  | 2.2 | 0.0  | 0.0 | 5.1 | 10.8 |
| -Office hours               | 0.0  | 2.2 | 0.0  | 0.0 | 0.0 | 0.0  |
| -Answering questions        | 2.1  | 2.2 | 0.0  | 0.0 | 0.0 | 8.1  |
| -Responding to emails       | 0.0  | 0.0 | 0.0  | 0.0 | 0.0 | 2.7  |
| -Offering materials         | 6.3  | 8.7 | 0.0  | 0.0 | 2.6 | 8.1  |
| -Flexible due dates         | 0.0  | 0.0 | 0.0  | 0.0 | 0.0 | 0.0  |
| -Feedback on assignments    | 0.0  | 0.0 | 0.0  | 0.0 | 0.0 | 0.0  |
| -Encouraging SI attendance  | 0.0  | 0.0 | 0.0  | 0.0 | 0.0 | 0.0  |
| -Bonus points               | 0.0  | 4.3 | 0.0  | 0.0 | 0.0 | 0.0  |
| -Due date reminders         | 0.0  | 0.0 | 0.0  | 0.0 | 0.0 | 0.0  |
| -Generic help               | 0.0  | 0.0 | 0.0  | 0.0 | 0.0 | 0.0  |
| -Clarity of explanations    | 0.0  | 4.3 | 0.0  | 0.0 | 7.7 | 24.3 |
| -Recognize student struggle | 0.0  | 0.0 | 0.0  | 0.0 | 0.0 | 0.0  |
| -Pace of lecture            | 4.2  | 8.7 | 0.0  | 0.0 | 2.6 | 5.4  |
| -Organization of class      | 0.0  | 0.0 | 0.0  | 0.0 | 0.0 | 0.0  |
| -Nature of exams            | 6.3  | 0.0 | 0.0  | 0.0 | 0.0 | 0.0  |
| -Other practices            | 0.0  | 0.0 | 0.0  | 0.0 | 0.0 | 8.1  |

Table S5: Comparison of relative prevalence of student comments about instructor support perceptions in each class at week 14 by higher- and lower-anxiety students (based on above and below class median anxiety levels at week 14). Relative prevalence is the number of codes mentioned by students in the lower- or higher-anxiety group, divided by the total number of those students in a class (numbers shown at the top of each column).

|                             | Class 1                                            |                                                     | Class 2                                            |                                                     | Class 3                                            |                                                     |
|-----------------------------|----------------------------------------------------|-----------------------------------------------------|----------------------------------------------------|-----------------------------------------------------|----------------------------------------------------|-----------------------------------------------------|
|                             | WEEK 14 –<br>LOW-<br>ANXIETY<br>STUDENTS<br>(N=42) | WEEK 14 –<br>HIGH-<br>ANXIETY<br>STUDENTS<br>(N=52) | WEEK 14 –<br>LOW-<br>ANXIETY<br>STUDENTS<br>(N=65) | WEEK 14 –<br>HIGH-<br>ANXIETY<br>STUDENTS<br>(N=45) | WEEK 14 –<br>LOW-<br>ANXIETY<br>STUDENTS<br>(N=29) | WEEK 14 –<br>HIGH-<br>ANXIETY<br>STUDENTS<br>(N=47) |
| +Interactions with students | 0.0                                                | 1.9                                                 | 1.5                                                | 4.4                                                 | 0.0                                                | 0.0                                                 |
| +Cares for student success  | 2.4                                                | 0.0                                                 | 6.2                                                | 8.9                                                 | 3.4                                                | 6.4                                                 |
| +Class climate              | 4.8                                                | 0.0                                                 | 15.4                                               | 6.7                                                 | 3.4                                                | 4.3                                                 |
| +Instructor personality     | 7.1                                                | 3.8                                                 | 40.0                                               | 40.0                                                | 0.0                                                | 0.0                                                 |
| +Office hours               | 19.0                                               | 15.4                                                | 16.9                                               | 11.1                                                | 13.8                                               | 8.5                                                 |
| +Answering questions        | 33.3                                               | 5.8                                                 | 12.3                                               | 22.2                                                | 13.8                                               | 0.0                                                 |
| +Responding to emails       | 5.8                                                | 9.5                                                 | 4.6                                                | 11.1                                                | 13.8                                               | 2.1                                                 |
| +Offering materials         | 16.7                                               | 7.7                                                 | 10.8                                               | 4.4                                                 | 10.3                                               | 0.0                                                 |
| +Flexible due dates         | 0.0                                                | 3.8                                                 | 9.2                                                | 8.9                                                 | 0.0                                                | 2.1                                                 |
| +Feedback on assignments    | 0.0                                                | 0.0                                                 | 3.1                                                | 0.0                                                 | 0.0                                                | 0.0                                                 |
| +Encouraging SI attendance  | 0.0                                                | 0.0                                                 | 1.5                                                | 0.0                                                 | 0.0                                                | 0.0                                                 |
| +Bonus points               | 0.0                                                | 0.0                                                 | 1.5                                                | 0.0                                                 | 13.8                                               | 12.8                                                |
| +Due date reminders         | 4.8                                                | 3.9                                                 | 3.1                                                | 2.2                                                 | 0.0                                                | 0.0                                                 |
| +Generic help               | 4.8                                                | 5.8                                                 | 7.7                                                | 8.9                                                 | 10.3                                               | 4.3                                                 |
| +Clarity of explanations    | 7.1                                                | 5.8                                                 | 10.8                                               | 11.1                                                | 3.4                                                | 0.0                                                 |
| +Recognize student struggle | 0.0                                                | 0.0                                                 | 0.0                                                | 0.0                                                 | 0.0                                                | 0.0                                                 |
| +Pace of lecture            | 2.4                                                | 0.0                                                 | 6.2                                                | 4.4                                                 | 3.4                                                | 0.0                                                 |



|                             |      |      |  |     |      |  |      |      |
|-----------------------------|------|------|--|-----|------|--|------|------|
| +Organization of class      | 0.0  | 0.0  |  | 1.5 | 2.2  |  | 0.0  | 0.0  |
| +Nature of exams            | 2.4  | 0.0  |  | 1.5 | 2.2  |  | 0.0  | 0.0  |
| +Other practices            | 2.4  | 0.0  |  | 9.2 | 26.7 |  | 0.0  | 0.0  |
| -Interactions with students | 0.0  | 0.0  |  | 0.0 | 0.0  |  | 0.0  | 8.5  |
| -Cares for student success  | 2.4  | 7.7  |  | 0.0 | 0.0  |  | 3.4  | 12.8 |
| -Class climate              | 4.8  | 7.7  |  | 0.0 | 0.0  |  | 13.8 | 36.2 |
| -Instructor personality     | 0.0  | 3.8  |  | 0.0 | 0.0  |  | 3.4  | 10.6 |
| -Office hours               | 0.0  | 0.0  |  | 0.0 | 0.0  |  | 0.0  | 2.1  |
| -Answering questions        | 4.8  | 5.8  |  | 0.0 | 0.0  |  | 3.4  | 8.5  |
| -Responding to emails       | 2.4  | 1.9  |  | 0.0 | 0.0  |  | 0.0  | 2.1  |
| -Offering materials         | 11.9 | 28.8 |  | 0.0 | 0.0  |  | 0.0  | 0.0  |
| -Flexible due dates         | 0.0  | 0.0  |  | 0.0 | 0.0  |  | 0.0  | 0.0  |
| -Feedback on assignments    | 0.0  | 1.9  |  | 0.0 | 0.0  |  | 0.0  | 0.0  |
| -Encouraging SI attendance  | 0.0  | 0.0  |  | 0.0 | 0.0  |  | 0.0  | 0.0  |
| -Bonus points               | 0.0  | 0.0  |  | 0.0 | 0.0  |  | 0.0  | 0.0  |
| -Due date reminders         | 0.0  | 0.0  |  | 0.0 | 0.0  |  | 0.0  | 0.0  |
| -Generic help               | 2.4  | 3.8  |  | 0.0 | 0.0  |  | 3.4  | 6.4  |
| -Clarity of explanations    | 4.8  | 11.5 |  | 0.0 | 0.0  |  | 3.4  | 12.8 |
| -Recognize student struggle | 0.0  | 1.9  |  | 0.0 | 0.0  |  | 0.0  | 0.0  |
| -Pace of lecture            | 7.1  | 7.7  |  | 1.5 | 0.0  |  | 0.0  | 4.3  |
| -Organization of class      | 0.0  | 0.0  |  | 1.5 | 0.0  |  | 0.0  | 2.1  |
| -Nature of exams            | 4.8  | 5.8  |  | 1.5 | 0.0  |  | 0.0  | 4.3  |
| -Other practices            | 0.0  | 1.9  |  | 0.0 | 0.0  |  | 6.9  | 8.5  |
